# Supplementary material
Source: MDPI journal article supplement (https://www.mdpi.com/2073-4344/10/1/113)
Supplement: s1 [file s1]

Supplementary Materials

# Effect of Reduction of Pt-Sn/ $\alpha$ -Al<sub>2</sub>O<sub>3</sub> on Catalytic Dehydrogenation of Mixed-paraffin Feed

Suresh Avithi Kannappan,<sup>1,2</sup> and Udaya Bhaskar Reddy Ragula<sup>1,2,\*</sup>

<sup>1</sup> Department of Chemical Engineering and Materials Science, Amrita School of Engineering, Coimbatore, Amrita Vishwa Vidyapeetham, Coimbatore 641112, India; aksureshchem91@gmail.com

<sup>2</sup> Centre of Excellence in Advanced Materials and Green Technologies, Amrita School of Engineering, Coimbatore, Amrita Vishwa Vidyapeetham, Coimbatore 641112, India

\* Correspondence: u\_bhaskarreddy@cb.amrita.edu

In The feed gases were analyzed in GC. Little quantity of isobutene was present in feed gas. But the quantity of isobutane formed in butane dehydrogenation and mixed feed dehydrogenation is comparatively high due to dehydrogenation reaction. n-butane, acetylene, C<sub>4</sub>s and C<sub>5</sub>s are the products formed during propane dehydrogenation.

The same propane gas only used in mixed feed but the product profile was different. Because of different reaction kinetics. The GC profile of feed gases (for mixed feed) was presented in Figure. S1. And concentration of feed gas (before reaction) and product gas (after reaction) were presented in Table. S1.

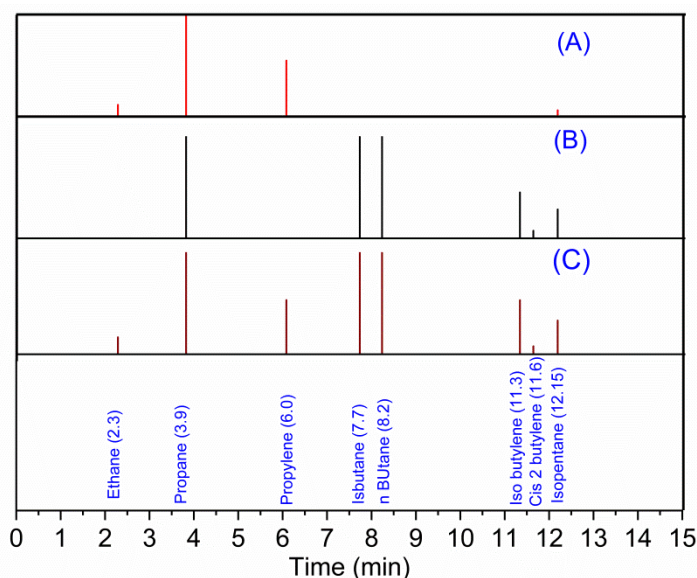

**Figure S1.** Fresh feed profiles obtained from GC-MS analysis: (A) Propane only, (B) Butane only, (C) Mixed feed

**Table S1.** GC-MS analysis result of Mixed feed

| Compound     | R time | Mixed Feed (Propane+Butane) |           |                         |           |
|--------------|--------|-----------------------------|-----------|-------------------------|-----------|
|              |        | Feed                        |           | Product                 |           |
|              |        | (Before dehydrogenation)    |           | (After dehydrogenation) |           |
|              |        | Area                        | ppm       | Area                    | ppm       |
| Methane      | 1.9    | 0                           | 0         | 1506508                 | 38822.83  |
| Ethane       | 2.26   | 1668.7                      | 41.73     | 110619.5                | 2850.67   |
| Ethylene     | 2.7    | 0                           | 0         | 3252833                 | 83825.77  |
| Propane      | 3.79   | 2.13E+07                    | 533164.98 | 16777937                | 432368.79 |
| cyclopropane | 5.8    | 0                           | 0         | 1465.8                  | 37.77     |
| propylene    | 6.05   | 5315.6                      | 132.93    | 3871886                 | 99778.80  |
| Iso butane   | 7.7    | 58088.2                     | 1452.6749 | 46553.4                 | 1199.69   |

|                     |       |          |           |          |           |
|---------------------|-------|----------|-----------|----------|-----------|
| <b>n butane</b>     | 8.2   | 1.86E+07 | 464972.92 | 12958953 | 333953.26 |
| <b>propadine</b>    | 8.3   | 0        | 0         | 0        | 0         |
| <b>Acetylene</b>    | 8.9   | 0        | 0         | 0        | 0         |
| <b>iso butylene</b> | 11.3  | 5298.3   | 132.50    | 39692    | 1022.87   |
| <b>cis 2 butene</b> | 11.6  | 781.4    | 19.54     | 190659.6 | 4913.31   |
| <b>iso pentane</b>  | 12.15 | 3307.6   | 82.72     | 9822.8   | 253.13    |
| <b>n pentane</b>    | 12.6  | 0        | 0         | 31123.7  | 802.06    |
| <b>1 pentane</b>    | 14.6  | 0        | 0         | 6637.1   | 171.04    |
|                     |       | 39987060 |           | 38804691 |           |
